# Supplementary material for: Further phenotypic features and two novel POC1A variants in a patient with SOFT syndrome: A case report
Source: PubMed Central journal article supplement — Mol Med Rep. 2021 May 5;24(1):494. doi: 10.3892/mmr.2021.12133 (PMC8127052; doi:10.3892/mmr.2021.12133), 2021-05-05
Supplement: Supplementary_Data.pdf [file Supplementary_Data.pdf]

Figure S1. Evidence that excludes Turner syndrome. A total of 33 metaphase cells were analyzed for the patients, all were normal. (A) Chromosome at Metaphase. (B) Karyotype image, the arrow indicates two normal X chromosomes.

A

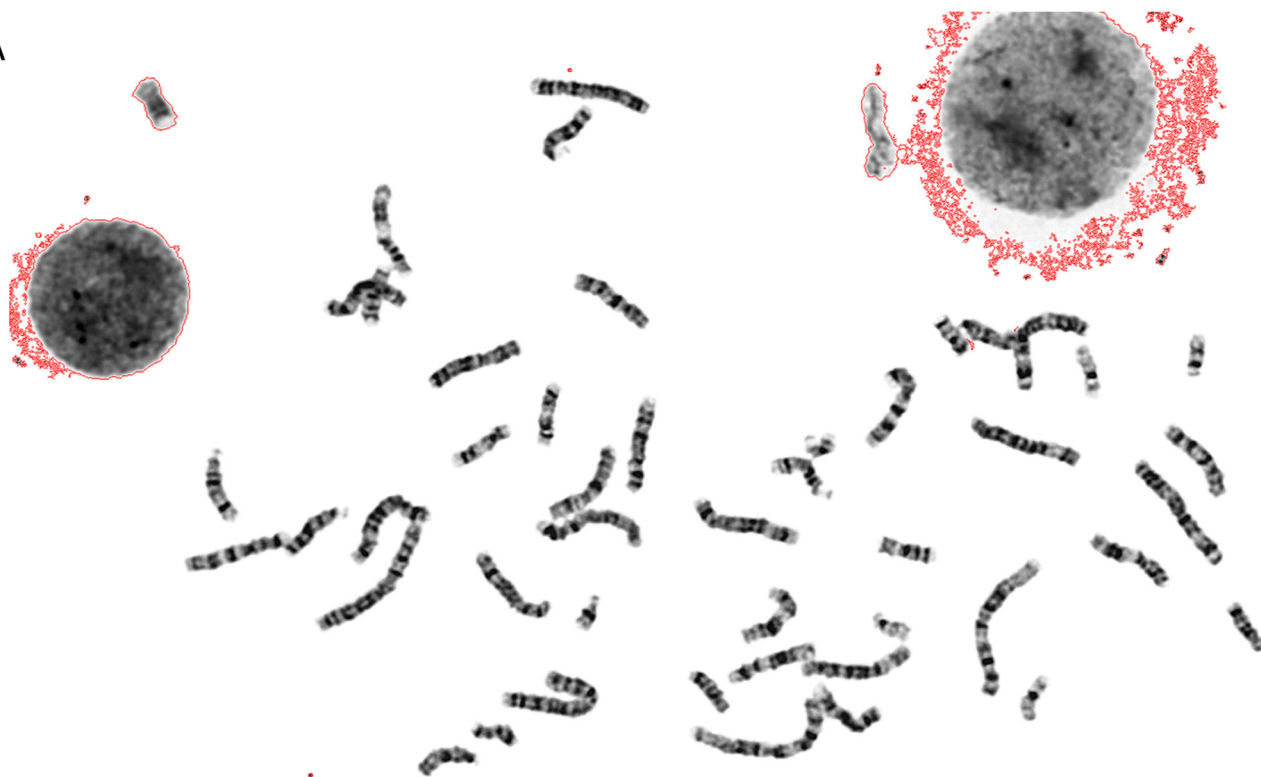

B

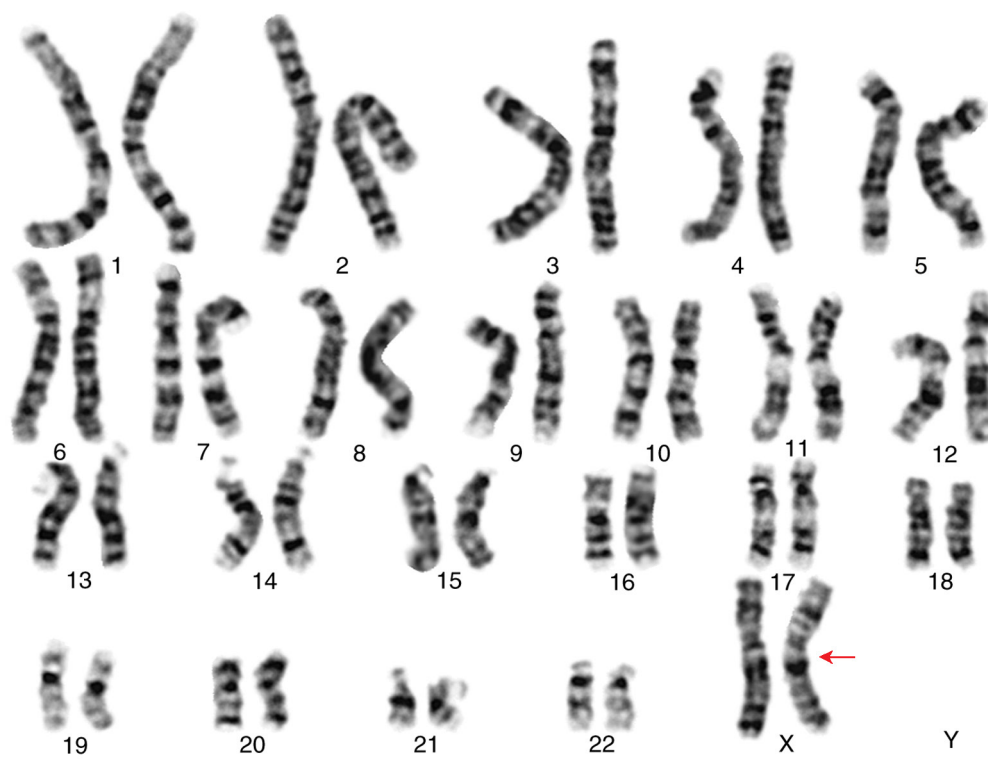

Table SI. POC1 centriolar protein A (NM\_015426.5) pathogenic variants reported in humans.

| First author/s, year                                     | Population   | Families | Type of variant       | Pathogenic variant                                                                | (Refs.) |
|----------------------------------------------------------|--------------|----------|-----------------------|-----------------------------------------------------------------------------------|---------|
| Shalev <i>et al</i> , 2012;<br>Sarig <i>et al</i> , 2012 | Arab Muslim  | 2        | Homozygous missense   | c.512T>C: p.Leu171Pro                                                             | (1,3)   |
| Shaheen <i>et al</i> , 2012                              | Saudi Arabia | 3        | Homozygous nonsense   | c.241C>T:p.Arg81*                                                                 | (2)     |
| Koparir <i>et al</i> , 2015                              | Turkish      | 1        | Homozygous missense   | c.358A>G:p.Thr120Ala                                                              | (5)     |
| Barraza-García <i>et al</i> , 2016                       | Spanish      | 1        | Homozygous truncating | c.254delT:p.Leu85Alafs*22                                                         | (7)     |
|                                                          | Moroccan     | 1        | Homozygous truncating | c.515G>A:p.Trp172*                                                                |         |
| Ko <i>et al</i> , 2016                                   | Korean       | 1        | Compound heterozygous | c.239C>T:p.Ser80Phe;<br>c.241>T: p.Arg81*                                         | (6)     |
| Mostofizadeh <i>et al</i> , 2018                         | Iranian      | 1        | Homozygous missense   | c.G491A:pSer164Asn                                                                | (9)     |
| Saida <i>et al</i> , 2019                                | Chilean      | 1        | Homozygous missense   | c. 649C>T:p.Arg217Trp                                                             | (8)     |
| Al-Kindi <i>et al</i> , 2020                             | Omani        | 2        | Homozygous missense   | c.64G>T: p.Val22Phe                                                               | (4)     |
| Chen <i>et al</i> , 2015                                 | Italian      | 1        | Homozygous truncating | c.1048delC: p.Gln250Argfs*4                                                       | (10)    |
| Giorgio <i>et al</i> , 2017                              | Italian      | 1        | Homozygous frameshift | c.1047_1048dupC:<br>p.Gly337Argfs*25                                              | (11)    |
| Present study                                            | Chinese      | 1        | Compound heterozygous | c.850_851insG:p.Glu284Glyfs*9;<br>c.593_605delGTGGGACGTG<br>CAT: p.Ser198Metfs*10 | -       |
